# Supplementary material
Source: publisher site journal article supplement (https://www.dovepress.com/article/556157)
Supplement: Supplementary file 1 [file 556157%20Revised%20Supplemental%20materials.docx]

Supplemental Table 1 Factors related to serum receptor-interacting protein kinase-1 levels following aneurysmal subarachnoid hemorrhage via univariate linear regression analysis

| Variables | β (95% CI) | P value |
| --- | --- | --- |
| Gender (male/female) | 0.032 (0.954-1.017) | 0.950 |
| Age (years) | 0.016 (-0.027-0.060) | 0.462 |
| Cigarette smoking | 0.830 (-0.289-1.949) | 0.145 |
| Alcohol consumption | -0.106 (-1.151-0.938) | 0.841 |
| Hypertension | -0.009 (-1.070-1.052) | 0.987 |
| Diabetes mellitus | -0.207 (-1.540-1.126) | 0.760 |
| Hyperlipidemia | -0.371 (-1.482-0.740) | 0.511 |
| Admission time (h) | -0.002 (-0.095-0.091) | 0.966 |
| Blood-collection time (h) | -0.019 (-0.111-0.074) | 0.689 |
| Systolic arterial pressure (mmHg) | -0.001 (-0.028-0.026) | 0.934 |
| Diastolic arterial pressure (mmHg) | 0.019 (-0.019-0.056) | 0.323 |
| Hunt-Hess scores | 1.186 (0.853-1.519) | <0.001 |
| Modified Fisher scores | 1.592 (1.181-2.003) | <0.001 |
| Aneurysmal position  (posterior/anterior circulation) | -0.391 (-1.508-0.725) | 0.490 |
| Aneurysmal shape (cystic/others) | -0.682 (-1.882-0.517) | 0.264 |
| Aneurysmal diameter  (<10 mm/≥10 mm) | -0.690 (-2.106-0.725) | 0.338 |
| Intraventricular bleeding | 1.563 (0.406-2.721) | 0.008 |
| Acute hydrocephalus | 1.586 (0.324-2.847) | 0.014 |
| External ventricular drainage | 1.482 (0.305-2.660) | 0.014 |
| Blood leucocyte count (×109/L) | 0.379 (0.185-0.573) | <0.001 |
| Blood CRP levels (mg/L) | 0.057 (0.010-0.103) | 0.017 |
| Blood glucose levels (mmol/L) | 0.163 (0.027-0.299) | 0.019 |

CRP indicates C-reactive protein; β, beta; 95% CI, 95% confidence interval.

Supplemental Table 2 Factors in correlation with modified Rankin Scale scores three months after aneurysmal subarachnoid hemorrhage via univariate linear regression analysis

| Variables | β (95% CI) | P value |
| --- | --- | --- |
| Gender (male/female) | 0.150 (-0.277-0.577) | 0.489 |
| Age (years) | 0.018 (-0.001-0.037) | 0.059 |
| Cigarette smoking | -0.028 (-0.516-0.460) | 0.911 |
| Alcohol consumption | 0.038 (-0.415-0.492) | 0.868 |
| Hypertension | 0.217 (-0.242-0.677) | 0.352 |
| Diabetes mellitus | 0.113 (-0.465-0.691) | 0.701 |
| Hyperlipidemia | 0.091 (-0.391-0.573) | 0.711 |
| Admission time (h) | -0.032 (-0.072-0.008) | 0.117 |
| Blood-collection time (h) | -0.031 (-0.071-0.009) | 0.126 |
| Systolic arterial pressure (mmHg) | -0.001 (-0.012-0.011) | 0.891 |
| Diastolic arterial pressure (mmHg) | 0.010 (-0.006-0.026) | 0.219 |
| Hunt-Hess scores | 0.762 (0.639-0.886) | <0.001 |
| Modified Fisher scores | 0.936 (0.779-1.093) | <0.001 |
| Aneurysmal position  (posterior/anterior circulation) | -0.021 (-0.506-0.464) | 0.933 |
| Aneurysmal shape (cystic/others) | 0.346 (-0.174-0.866) | 0.191 |
| Aneurysmal diameter  (<10 mm/≥10 mm) | 0.334 (-0.280-0.948) | 0.284 |
| Intraventricular bleeding | 1.374 (0.897-1.850) | <0.001 |
| Acute hydrocephalus | 1.086 (0.550-1.622) | <0.001 |
| External ventricular drainage | 1.225 (0.734-1.717) | <0.001 |
| Blood leucocyte count (×109/L) | 0.188 (0.104-0.271) | <0.001 |
| Blood CRP levels (mg/L) | 0.034 (0.015-0.054) | 0.001 |
| Blood glucose levels (mmol/L) | 0.156 (0.100-0.212) | <0.001 |
| Serum RIPK1 levels (ng/mL) | 0.188 (0.136-0.240) | <0.001 |

CRP indicates C-reactive protein; β, beta; 95% CI, 95% confidence interval; RIPK1, receptor-interacting protein kinase-1.

Supplemental Table 3 Factors associated with delayed cerebral ischemia post-aneurysmal subarachnoid hemorrhage via univariate binary logistic regression analysis

| Variables | OR (95% CI) | P value |
| --- | --- | --- |
| Gander (male/female) | 0.753 (0.407-1.390) | 0.364 |
| Age (years) | 0.987 (0.960-1.015) | 0.351 |
| Cigarette smoking | 0.794 (0.384-1.641) | 0.533 |
| Alcohol consumption | 0.835 (0.429-1.624) | 0.595 |
| Hypertension | 0.857 (0.446-1.648) | 0.644 |
| Diabetes mellitus | 1.738 (0.802-3.766) | 0.161 |
| Hyperlipidemia | 1.101 (0.554-2.190) | 0.783 |
| Admission time (h) | 0.998 (0.941-1.058) | 0.945 |
| Blood-collection time (h) | 1.000 (0.944-1.059) | 0.996 |
| Systolic arterial pressure (mmHg) | 1.001 (0.984-1.017) | 0.937 |
| Diastolic arterial pressure (mmHg) | 1.011 (0.987-1.035) | 0.385 |
| Hunt-Hess scores | 2.692 (1.978-3.662) | <0.001 |
| Modified Fisher scores | 3.272 (2.263-4.729) | <0.001 |
| Aneurysmal position  (posterior/anterior circulation) | 0.779 (0.395-1.539) | 0.472 |
| Aneurysmal shape (cystic/others) | 0.688 (0.336-1.410) | 0.307 |
| Aneurysmal diameter  (<10 mm/≥10 mm) | 1.769 (0.644-4.861) | 0.268 |
| Intraventricular bleeding | 4.431 (2.244-8.747) | <0.001 |
| Acute hydrocephalus | 3.364 (1.635-6.921) | 0.001 |
| External ventricular drainage | 3.808 (1.920-7.553) | <0.001 |
| Blood leucocyte count (×109/L) | 1.334 (1.165-1.528) | <0.001 |
| Blood CRP levels (mg/L) | 1.045 (1.012-1.080) | 0.007 |
| Blood glucose levels (mmol/L) | 1.172 (1.078-1.273) | <0.001 |
| Serum RIPK1 levels (ng/mL) | 1.263 (1.147-1.390) | <0.001 |

CRP indicates C-reactive protein; OR, odds ratio; 95% CI, 95% confidence interval; RIPK1, receptor-interacting protein kinase-1.

Supplemental Table 4 Factors in association with 3-month poor prognosis following aneurysmal subarachnoid hemorrhage via univariate binary logistic regression analysis

| Variables | OR (95% CI) | P value |
| --- | --- | --- |
| Gander (male/female) | 0.846 (0.472-1.518) | 0.575 |
| Age (years) | 1.025 (0.998-1.053) | 0.068 |
| Cigarette smoking | 1.118 (0.577-2.166) | 0.741 |
| Alcohol consumption | 1.157 (0.626-2.141) | 0.642 |
| Hypertension | 1.159 (0.611-2.197) | 0.651 |
| Diabetes mellitus | 1.805 (0.857-3.803) | 0.120 |
| Hyperlipidemia | 1.047 (0.542-2.022) | 0.891 |
| Admission time (h) | 0.986 (0.932-1.043) | 0.619 |
| Blood-collection time (h) | 0.988 (0.935-1.045) | 0.680 |
| Systolic arterial pressure (mmHg) | 0.998 (0.982-1.014) | 0.784 |
| Diastolic arterial pressure (mmHg) | 1.006 (0.984-1.029) | 0.583 |
| Hunt-Hess scores | 2.848 (2.105-3.853) | <0.001 |
| Modified Fisher scores | 3.421 (2.388-4.899) | <0.001 |
| Aneurysmal position  (posterior/anterior circulation) | 0.826 (0.430-1.588) | 0.567 |
| Aneurysmal shape (cystic/others) | 1.361 (0.644-2.878) | 0.419 |
| Aneurysmal diameter  (<10 mm/≥10 mm) | 0.950 (0.411-2.193) | 0.904 |
| Intraventricular bleeding | 4.011 (2.067-7.785) | <0.001 |
| Acute hydrocephalus | 2.879 (1.420-5.838) | 0.003 |
| External ventricular drainage | 2.786 (1.430-5.427) | 0.003 |
| Blood leucocyte count (×109/L) | 1.238 (1.093-1.402) | 0.001 |
| Blood CRP levels (mg/L) | 1.042 (1.010-1.076) | 0.010 |
| Blood glucose levels (mmol/L) | 1.249 (1.144-1.363) | <0.001 |
| Serum RIPK1 levels (ng/mL) | 1.282 (1.164-1.412) | <0.001 |

CRP indicates C-reactive protein; OR, odds ratio; 95% CI, 95% confidence interval; RIPK1, receptor-interacting protein kinase-1.
